# Supplementary material
Source: Elsevier journal article supplement (https://comptes-rendus.academie-sciences.fr/geoscience/article/10.1016/j.crte.2018.06.004/file/attach/mmc4.pdf)
Supplement: mmc4 [file mmc4.pdf]

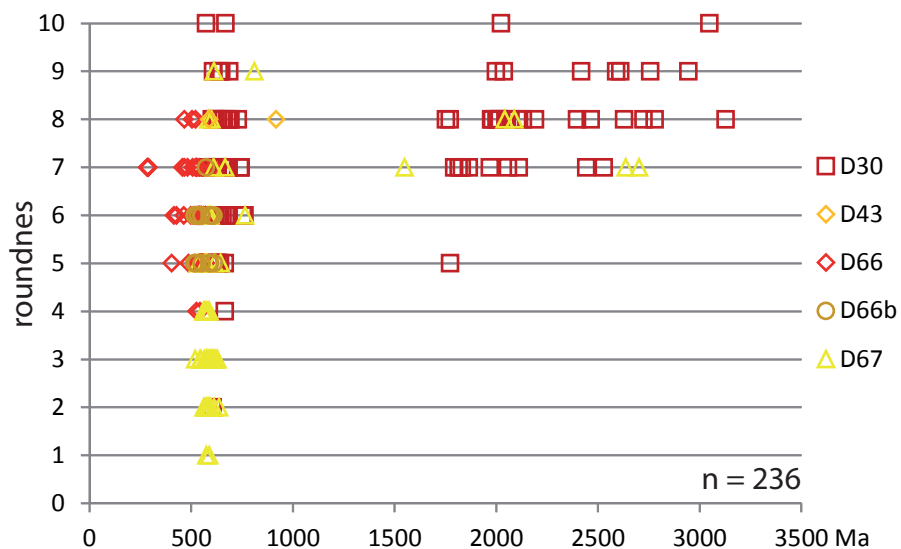

**Supplementary figure 4:** Age vs. roundness plot of all concordant zircon grains of the Sebkhya Gezmayet unit.
